# Supplementary material for: Very high temperature tiling of tetraphenylporphyrin on rutile TiO2(110)
Source: Royal Society of Chemistry journal article supplement (doi:10.1039/c7nr04093h), 2017-01-01
Supplement: c7nr04093h1.pdf [file c7nr04093h1.pdf]

## SUPPORTING INFORMATION

### Very high temperature porphyrin tiling of rutile $\text{TiO}_2(110)$ .

Giacomo Lovat,<sup>a,b</sup> Daniel Forrer,<sup>c</sup> Mikel Abadia,<sup>d</sup> Marcos Dominguez,<sup>a,b</sup> Maurizio Casarin,<sup>e</sup> Celia Rogero,<sup>d</sup> Andrea Vittadini<sup>\*c</sup> and Luca Floreano<sup>\*a</sup>

## Supporting Information

### Identification of $\text{Ti}^{5f}$ and $\text{O}_{br}$ rows on (2x1) reconstruction.

On a highly reduced substrate we obtained local coexistence of (1x1) and (2x1) reconstructed domains, as shown in Fig. S1. The  $\text{Ti}^{5f}$  rows are easily identified on the (1x1) surface since they appear as bright rows extending in the [001] direction at both positive and negative bias. The  $\text{O}_{br}$  rows are always dark

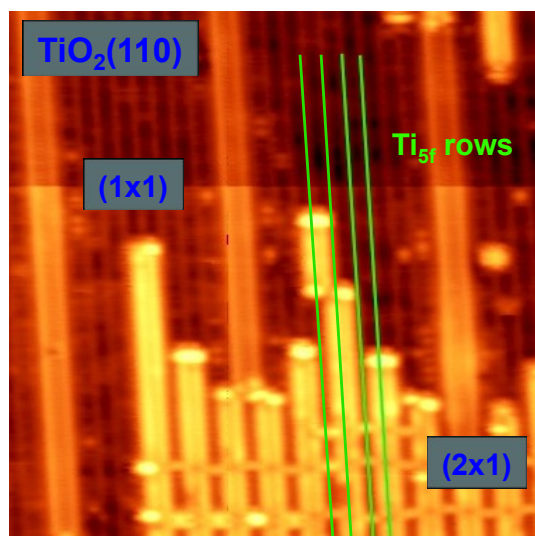

**Fig. S1** STM image on a clean  $\text{TiO}_2(110)$  surface where (1x1) and (2x1) domains coexist on the same terrace. Extrapolation of the  $\text{Ti}^{5f}$  rows from the (1x1) region to the (2x1) regions is shown, which allows the assignment of the  $\text{Ti}^{5f}$  rows on the (2x6) superlattice of Fig. 4b.

<sup>a</sup> CNR-IOM, Laboratorio Nazionale TASC, I-34149 Trieste, Italy. E-mail: floreano@iom.cnr.it

<sup>b</sup> Graduate School of Nanotechnology, University of Trieste, P.za Europa 1, I-34127 Trieste, Italy.

<sup>c</sup> CNR-ICMATE and INSTM, via Marzolo 1, I-35131 Padova, Italy. E-mail: andrea.vittadini@unipd.it

<sup>d</sup> Materials Physics Center MPC, Centro de Física de Materiales (CSIC-UPV/EHU) and Donostia International Physics Center (DIPC), E-20018 San Sebastian, Spain.

<sup>e</sup> Dipartimento di Scienze Chimiche, Università di Padova, via Marzolo 1, I-35131 Padova, Italy.

eventually yielding bright atomic spots in correspondence of adsorbed hydrogen (hydroxyl). In the high resolution image of Fig. S1, one can appreciate the (2x1) reconstruction as made of paired bright rows separated by a large dark row.  $\text{Ti}^{5f}$  rows of the (1x1) surface are seen to correspond alternatively to the middle of the (2x1) dark rows and to the middle of the (2x1) bright paired rows. In the large scale image of Fig. 3b, the paired bright rows are not individually resolved and the (2x1) reconstruction appears as simply made by alternating bright and dark rows, each one corresponding to a  $\text{Ti}^{5f}$  row of the (1x1) domain (see inset of Fig. 3b).

### Comparison of XPS intensities

For a direct comparison of the N and C 1s peak intensity as a function of the annealing temperature, we measured the photoemission spectra of the relevant core levels at a photon energy of 650 eV. Since the coverage is in the monolayer range, we directly compared the N and C 1s spectra after simple normalization to the Ti 2p core level, as shown in Fig. S2b. In this case, one can appreciate the almost perfect overlap of the Ti 2p spectra with and without the molecular overlayer, and before and after the different annealing steps. The absence of significant variation of the low energy tail indicates that no change of the amount of  $\text{Ti}^{3+}$  and  $\text{Ti}^{2+}$  ions is observed upon self-

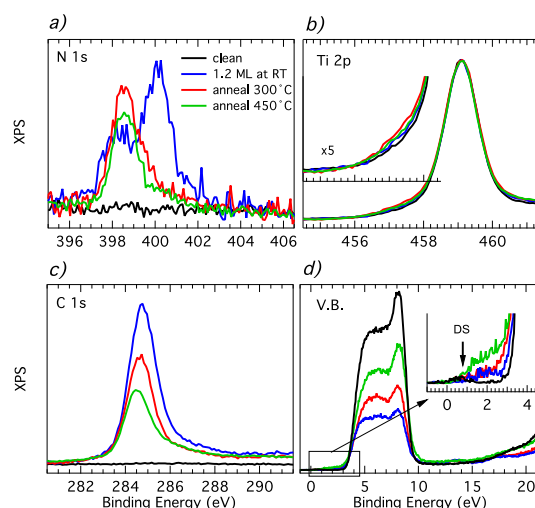

**Fig. S2** Photoemission spectra of the N 1s, Ti 2p and C 1s peaks measured with a photon energy of 650 eV and an overall resolution of 250 meV, panels a), b), and c). The spectra have been normalized to the Ti 2p peak intensity. The Valence Band spectrum is shown in panel d), as measured with a photon energy of 140 meV and an overall energy resolution of 120 meV. The spectra are to scale after simple normalization to the photon flux. The inset of panel c) shows a zoom of the Band Gap putting in evidence the Defect State, DS, of the bare titanium dioxide.

## SUPPORTING INFORMATION

metalation and cyclo-dehydrogenation. We can conclude that the Ti atom incorporated in the porphyrin macrocycle must have the same oxidation state of Ti atoms in the substrate. Minor deviations of the Ti 2p tail from the pristine clean surface (as highlighted in the inset of Fig. S2b) are originated by the RHEED irradiation corresponding to the diffraction patterns shown in Fig. 1. These minor changes mostly affect the film after the RT deposition and the intermediate self-metalation reaction (also compare with measurements in Ref. [26]). In fact, electron irradiation is known to reduce the  $\text{TiO}_2(110)$  surface in vacuum, which may also trigger the formation of residual molecules in different oxidation states. This minority component is however desorbed upon further annealing beyond  $350^\circ\text{C}$ . The corresponding N 1s and C 1s peaks show that the full monolayer of 2H/4HTPP is converted into a metalated  $\text{TiO}_2\text{TPP}$  monolayer. In particular, molecules in excess of 1 ML are simply desorbed after annealing to  $300^\circ\text{C}$  as witnessed by the consistent intensity decrease of the N and C peaks. Further heating beyond  $400^\circ\text{C}$  leads to a decrease of about 20% of the N and C intensity, which is in excellent agreement with the expected decrease of the molecular density across the  $(2\times 4)\text{-obliq} \rightarrow (2\times 6)$  phase transition. Finally, we show in Fig. S2d the Valence Band measured with a photon energy of 140 eV. In this case the spectra are simply normalized to the photon flux, thus one can appreciate the attenuation of the O 2p band (in the 4-9 eV range) after deposition of  $\sim 1.2$  ML, and the following intensity increase due to desorption of 2nd layer molecules at  $300^\circ\text{C}$  and then to the desorption of excess 1st layer molecules associated with the  $(2\times 4)\text{-obliq} \rightarrow (2\times 6)$  phase transition.
